# Supplementary material for: Neuroprotective Surgical Strategies in Parkinson’s Disease: Role of Preclinical Data
Source: PubMed Central journal article supplement (PMC5666871; doi:10.3390/ijms18102190), 2017-10-20
Supplement: ijms-18-02190-s001.pdf [file ijms-18-02190-s001.pdf]

**Supplementary Data:** Additional clinical studies information for each evaluated intervention.

**Table S1.** Clinical Studies STN DBS long term evaluation.

| Clinical Study                 | Type                                                                                     | No. | Follow Up (years) | Disease Duration (Years) | UPDRS-III off/off* (0–108)                                                                                                                           | UPDRS-III on/on** (0–108)                                                         | L-Dopa Reduction (mg/day)(LEDD)                                                                                                            |
|--------------------------------|------------------------------------------------------------------------------------------|-----|-------------------|--------------------------|------------------------------------------------------------------------------------------------------------------------------------------------------|-----------------------------------------------------------------------------------|--------------------------------------------------------------------------------------------------------------------------------------------|
| Rodriguez et al., 2005         | Long-term prospective evaluation Gpi vs. STN                                             | 49  | 4                 | 15.4 ± 6.3               | <b>Baseline:</b> 56.7 ± 15.7 <b>1y:</b> 53.7 ± 16.4 <b>4y:</b> 54.8 ± 16.5                                                                           | <b>1 y:</b> 27.9 ± 17.2 <b>4 y:</b> 29.5 ± 20.6                                   | <b>Baseline:</b> 1336 ± 619                                                                                                                |
| Schüpbach et al., 2005         | Long-term prospective evaluation                                                         | 37  | 5                 | 11 ± 1.0                 | <b>Baseline:</b> 51.9 ± 17.2 <b>6m:</b> 46.7 ± 19.2 <b>2y:</b> 42.5 ± 15.6 <b>5y:</b> 51.3 ± 15.4                                                    | <b>6 m:</b> 11.3 ± 9.7; <b>2 y:</b> 10.1 ± 9.9; <b>5 y:</b> 17.9 ± 12.3           | <b>Baseline:</b> 1468 ± 811 <b>6 m:</b> 559 ± 433 <b>24 m:</b> 652 ± 448 <b>60 m:</b> 667 ± 504                                            |
| Visser-Vandewalle et al., 2005 | Long-term prospective evaluation                                                         | 20  | 5                 | no data                  | <b>Baseline:</b> 42.3 ± 9.3 <b>4y:</b> 53.6 ± 20.6                                                                                                   | <b>3 m:</b> 10.1 ± 5.9 <b>4 y:</b> 14.4 ± 7.5                                     | 47.2% from baseline at 4 y                                                                                                                 |
| Østergaard et al., 2006        | Long-term prospective evaluation                                                         | 26  | 4                 | 9 ± 5                    | <b>Baseline:</b> 51.3 ± 12.1 <b>1y:</b> 43.7 ± 13.1 <b>4y:</b> 51.0 ± 19.4                                                                           | <b>Baseline:</b> 23.5 ± 15.8; <b>1y:</b> 10.7 ± 7.2; <b>4y:</b> 20.7 ± 11.6c      | <b>Baseline:</b> 1197 ± 532 <b>1 y:</b> 964 ± 501 <b>4 y:</b> 852 ± 590                                                                    |
| Gervais-Bernard et al., 2009   | Long-term prospective evaluation                                                         | 23  | 5                 | 12.9 ± 3.2               | <b>Baseline:</b> 43.11 ± 14.04; <b>1y:</b> 41.5 ± 9.5 <b>5y:</b> 45.9 ± 10.8                                                                         | <b>Baseline:</b> 14.83 ± 9.80; <b>1 y:</b> 10.34 ± 5.47; <b>5 y:</b> 13.17 ± 5.48 | <b>Baseline:</b> 1188 ± 465 <b>1 y:</b> 333.7 ± 375 mg <b>5y:</b> 509 ± 344 mg                                                             |
| Moro et al., 2010              | Open. Non-randomized. prospective multicenter clinical trial and randomized double blind | 49  | 6                 | 13.5–15.3                | <b>Baseline:</b> 56.5; <b>3m:</b> 54.0 ± 23.0; <b>5–6 y:</b> 55.0 ± 23                                                                               | <b>Baseline:</b> 22.9 ± 2.0; <b>3 y:</b> 18.6 ± 2.6; <b>5–6 y:</b> 24.6 ± 2.9     | LEDD was not significantly reduced at 5 to 6 years                                                                                         |
| Tagliati et al., 2010          | Long-term retrospective evaluation                                                       | 50  | 5                 | 11 ± 1.0                 | <b>Baseline:</b> 40.1 ± 13.8; <b>1y:</b> 38.1 ± 13.1; <b>2y:</b> 39.3 ± 13.6; <b>3y:</b> 43.3 ± 14.9 <b>4 y:</b> 40.9 ± 14.1; <b>5y:</b> 42.1 ± 14.5 | no data                                                                           | <b>Baseline:</b> 1054 ± 506; <b>1 y:</b> 773 ± 528 <b>2 y:</b> 789 ± 586 <b>3 y:</b> 556 ± 275 <b>4 y:</b> 796 ± 778 <b>5 y:</b> 715 ± 411 |
| Castrioto et al., 2011         | Class III study: Prospective open label blind evaluated                                  | 18  | 10                | 13.4 ± 4.8               | <b>Baseline:</b> 50.2 ± 13.3; <b>1y:</b> 45.21 ± 11.8; <b>5y:</b> 49.3 ± 11.7; <b>10y:</b> 49.5 ± 10.3; <b>10y:</b> 48.6 ± 11.7;(blinded evaluation) | <b>Baseline:</b> 50.2 ± 13.3 <b>10y:</b> 35.0 ± 13.1(blinded evaluation)          | <b>Baseline:</b> 1237.8 ± 547; <b>1 y:</b> 665.6 ± 311.4; <b>5 y:</b> 705.6 ± 272.5; <b>10 y:</b> 788.9 ± 485.5                            |

|                      |                                               |    |      |                       |                                                                                                       |                                                                                                       |                                                                                                                                                   |
|----------------------|-----------------------------------------------|----|------|-----------------------|-------------------------------------------------------------------------------------------------------|-------------------------------------------------------------------------------------------------------|---------------------------------------------------------------------------------------------------------------------------------------------------|
| Merola et al., 2011  | Long-term retrospective evaluation            | 19 | 8.42 | 22.84 ± 2.29          | <b>Baseline:</b> 61.40; <b>7 y:</b> 63.23                                                             | <b>Baseline:</b> 18.25; <b>5 y:</b> 26.38; <b>7 y:</b> 27.57                                          | <b>Baseline:</b> 890.38 ± 299; <b>1 y:</b> 336.50 ± 189.30; <b>3 y:</b> 381.63 ± 180.46; <b>5 y:</b> 488.90 ± 265.50; <b>7 y:</b> 435.10 ± 223.20 |
| Zibetti et al., 2011 | Long-term prospective evaluation              | 14 | 9    | 17.0 ± 4.7–16.0 ± 5.1 | <b>Baseline:</b> 51.3 ± 15.4; <b>1 y:</b> 54.4 ± 10.9; <b>5y:</b> 54.9 ± 12.8; <b>9y:</b> 56.3 ± 18.4 | <b>Baseline:</b> 16.5 ± 11.0; <b>1 y:</b> 11.4 ± 6.8; <b>5 y:</b> 17.4 ± 8.1; <b>9 y:</b> 23.4 ± 11.0 | <b>Baseline:</b> 955 ± 406 <b>1 y:</b> 412 ± 265 <b>5 y:</b> 569 ± 288 <b>9 y:</b> 579 ± 295                                                      |
| Merola et al., 2013  | Comparative retrospective medical DBS vs. STN | 19 | 6    | 12 ± 1                | <b>Baseline:</b> 45.37 ± 8.09; <b>6 y:</b> 53.47 ± 16.81                                              | <b>Baseline:</b> 14.79 ± 4.40; <b>6 y:</b> 24.97 ± 14.16                                              | <b>Baseline:</b> 935.6 ± 21.5 <b>6 y:</b> 572.6 ± 19                                                                                              |

STN: Subthalamic nucleus; DBS: Deep brain Stimulation; UPDRS-III: Unified Parkinson's Disease Rating Scale part III; LEDD: levodopa equivalent daily dose; y: years; m: months; No: number of patients; \*:UDPRS score off stimulation and off medication; \*\*: UDPRS score on stimulation and on medication

**Table S2.** Clinical studies in cell grafting or transplant based therapies for Parkinson's disease.

| Clinical Study                                                                   | Type                         | No. | Therapeutics                                                                   | Outcome                                                                                                         | Side effects                                        | Dose/Immunosuppression                                      |
|----------------------------------------------------------------------------------|------------------------------|-----|--------------------------------------------------------------------------------|-----------------------------------------------------------------------------------------------------------------|-----------------------------------------------------|-------------------------------------------------------------|
| Backlund et al., 1985                                                            | Open label                   | 2   | Autologous adrenal medullary tissue: transplanted to the striatum unilaterally | Px 1:no change in scores, Px 2:slight worse after 2 years                                                       | Psychiatric symptoms (paranoia)                     | 15 pieces 2–3mm                                             |
| Lindvall et al., 1987                                                            | Open label                   | 2   | Autologous adrenal medullary tissue: transplanted to the striatum unilaterally | Px 3: 6month improvements then no change<br>Px 4: no change                                                     | no data                                             | 15 pieces 2–3mm                                             |
| Madrazo et al., 1987                                                             | Open label                   | 2   | Autologous adrenal medullary tissue: transplanted to the striatum unilaterally | Rigidity and akinesia: disparition, tremor reduced: UPDRS off state reduction at 3y in Px1: 33%,and in Px2: 46% | no data                                             |                                                             |
| Lindvall et al., 1989                                                            | Open label                   | 2   | Human fetal dopamine neurons : transplanted to the striatum unilaterally       | Modest clinical change. Increase response to Dopa.<br>F-Dopa PET: No changes                                    | no data                                             | 8 to 10 weeks age embryo/                                   |
| Lindvall et al., 1990                                                            | Open Label                   | 1   | Human fetal dopamine neurons : transplanted to the striatum unilaterally       | Off state changes in bradykinesia. Increase response Dopa. F-Dopa PET increase uptake :130%                     | no data                                             | 8 to 10 weeks age embryo/<br>Immunosuppression              |
| Tanner and United Parkinson Foundation Neurotransplantation Registry Group, 1991 | Multicentric open evaluation | 61  | Autologous adrenal medullary tissue : transplanted to the striatum             | UPDRS "off" state reduction at 2y: 19% in all Px                                                                | 18 surgical related dead, 22% psychiatric morbidity |                                                             |
| Henderson et al., 1991                                                           | Open Label                   | 12  | Human fetal dopamine neurons : transplanted to the striatum unilaterally       | 3 Px responded: 61%reduction levodopa 1 year                                                                    | 3Px deteriorated                                    | 11 to 18 weeks age embryos /<br>Immunosuppression not used. |

|                       |                                |   |                                                                          |                                                                                                                                                                                                                                                                                            |                                                                                                     |                                                                                          |
|-----------------------|--------------------------------|---|--------------------------------------------------------------------------|--------------------------------------------------------------------------------------------------------------------------------------------------------------------------------------------------------------------------------------------------------------------------------------------|-----------------------------------------------------------------------------------------------------|------------------------------------------------------------------------------------------|
| Freed et al., 1992    | Open Label                     | 7 | Human fetal dopamine neurons: transplanted to the striatum bilaterally   | UPDRS "on" state reduction in 6 Px: 39%, Hoen Yang score reduction $1.21 \pm 0.26$                                                                                                                                                                                                         | no data                                                                                             | 7 to 8 weeks age embryos / Immunosuppression                                             |
| Piccini et al., 2000  | Open Label                     | 4 | Human fetal dopamine neurons: transplanted to the striatum bilaterally   | F-Dopa PET increase uptake at 6,5 month, UPDRS "on" state reduction at 18 month: 50%; L-dopa reduction: 60%                                                                                                                                                                                | no data                                                                                             | 5-7 weeks age embryos; length of 13-27 mm from crown to rump/immunosuppression           |
| Iacono et al., 1992   | Open Label                     | 5 | Human fetal dopamine neurons: transplanted to the striatum bilaterally   |                                                                                                                                                                                                                                                                                            |                                                                                                     |                                                                                          |
| Lindvall et al., 1992 | Open Label                     | 2 | Human fetal dopamine neurons : transplanted to the striatum unilaterally | reduction of the time spent in the "off" state and the number of daily "off" periods; a lessening of bradykinesia and rigidity during the "off" state                                                                                                                                      | no data                                                                                             | 6-7 weeks age embryos/ immunosuppression                                                 |
| Spencer et al., 1992  | Randomized delayed onset study | 4 | Human fetal dopamine neurons : transplanted to the striatum unilaterally | 3 Px improve. Lower dose Dopa in 1Px. F-Dopa PET increase uptake in 1Px                                                                                                                                                                                                                    | lack serious side effects                                                                           | 7 to 11 weeks age embryos /Cyclosporine was administered for six months postoperatively. |
| Widner et al.,1992    | Open Label                     | 2 | Human fetal dopamine neurons: transplanted to the striatum bilaterally   | Levodopa was decrease 30% in 1Px; F-Dopa PET: increase uptake in all Px                                                                                                                                                                                                                    | no serious complications                                                                            | six to eight weeks age embryos /immunosuppression                                        |
| Freeman et al., 1995  | Open Label                     | 4 | Human fetal dopamine neurons: transplanted to the striatum bilaterally   | Total UPDRS 'off' state reduction: from $80.3 \pm 8.3$ to $58.0 \pm 10.5$ ; Schwab-England score off: from $51.3 \pm 5.2$ to $72.5 \pm 1.4$ ; F-Dopa PET: increase uptake of 53% on the right, 33% on the left                                                                             | Asymptomatic superficial cortical hemorrhage, transient postoperative confusion and hallucinations. | 6 1/2 to 9 weeks age embryos/ immunosuppression for 6 month                              |
| Defer et al., 1996    | Open Label                     | 5 | Human fetal dopamine neurons: transplanted to the striatum unilaterally  | Long-term bilateral improvement of skilled hand movements. A mild to moderate effect on the amount of 'off' time and 'on-off' fluctuations was observed, whereas, apart from one case, no clear effect on gait, walking and speech. L-dopa therapy at a similar or higher dose than before | Dementia in 1Px<br>Delayed asymmetrical dyskinesia in 3Px                                           |                                                                                          |
| Wenning et al., 1997  | Open Label                     | 6 | Human fetal dopamine neurons: transplanted to the striatum unilaterally  | F-Dopa PET: 68% increase uptake<br>Clinical Improvement in 4 Px                                                                                                                                                                                                                            | No consistent changes in dyskinesias                                                                |                                                                                          |

|                                  |                                      |    |                                                                                      |                                                                                                                                                                      |                                                                                                                                                              |                                                                |
|----------------------------------|--------------------------------------|----|--------------------------------------------------------------------------------------|----------------------------------------------------------------------------------------------------------------------------------------------------------------------|--------------------------------------------------------------------------------------------------------------------------------------------------------------|----------------------------------------------------------------|
| Hagell et al 1999                | Open Label                           | 5  | Human fetal dopamine neurons: transplanted to the striatum bilaterally(sequentially) | F-Dopa PET: 85% increase uptake                                                                                                                                      | Off medication dyskinesia in long term evaluation. Atypical features, who responded poorly to the first graft, worsened following the second transplantation | four to eight donors (6–8 weeks age embryos)/immunosuppression |
| Hauser et al., 1999              | Open Label                           | 6  | Human fetal dopamine neurons: transplanted to the striatum bilaterally               | UPDRS “off” state reduction :32%; time spent in “on” state without dyskinesia: improved from 22% to 60%; F-Dopa PET: increase uptake                                 | Two patients died: unrelated surgery                                                                                                                         | 6 1/2 to 9 weeks age embryos /immunosuppression                |
| Freed et al., 2001               | randomized double blind sham surgery | 40 | Human fetal dopamine neurons: transplanted to the striatum bilaterally               | F-Dopa PET: increase uptake in 17 Px                                                                                                                                 | dystonia and dyskinesia in “off” state in 15 percent of the patients 3 years after graft                                                                     |                                                                |
| Olanow et al., 2003              | randomized double blind sham surgery | 34 | Human fetal dopamine neurons: transplanted to the striatum bilaterally               | There was no significant overall effect UPDRS “off” state. F-Dopa PET increase uptake in grafted groups at 24 month                                                  | 56% Px with off-medication dyskinesia                                                                                                                        |                                                                |
| Mínguez-Castellanos et al., 2007 | open label phase I-II                | 13 | Carotid body (CB) glomus cells: transplanted to striatum bilaterally                 | UPDRS-III reduction: at 6 m:23%, 1 y: 5–74%, 3y: 15–48%.<br>F-Dopa PET: non-significant 5% increase uptake                                                           | No data                                                                                                                                                      | autologous CB graft/no immunosuppression                       |
| Kordower et al., 2008            | neuropato study                      | 1  | Human fetal dopamine neurons: transplanted to the striatum bilaterally               |                                                                                                                                                                      | Lewy body inclusion in grafted nigral neurons                                                                                                                |                                                                |
| Li et al., 2008                  | neuropato study                      | 2  | Human fetal dopamine neurons: transplanted to the striatum bilaterally               | 11–16 years evolution                                                                                                                                                | Lewy body inclusion in grafted nigral neurons                                                                                                                |                                                                |
| Venkataramana et al., 2010       | open label phase I-II                | 7  | BM-MSC: transplantation in sub-lateral ventricular zone unilaterally                 | UPDRS “off” state reduction: 22,9%; UPDRS “on” state reduction: 38%                                                                                                  | no adverse effects                                                                                                                                           | 1 million cells/kg body weight of BM-MSC/ no immunosuppression |
| Venkataramana et al., 2012       | open labelII-II                      | 12 | BM-MSCs: transplantation into the subventricular zone bilaterally                    | UPDRS “off” state reduction: 32%; UPDRS “on” state reduction: 17.92%; clinical improvement: clarity in speech, reduction in tremors, rigidity, and freezing attacks. | Parkinson plus no improvement                                                                                                                                | 1 million cells/kg body weight of BM-MSC/ no immunosuppression |

UPDRS: Unified Parkinson’s Disease Rating Scale; BM-MSC: Autologous bone-marrow-derived mesenchymal stem cell; F-Dopa PET: fluoro-3,4-dihydroxyphenylalnine positron emission tomography Px: Patient; No: number of patients.
